# Supplementary material for: Deoxygenation dynamics above the western Nile deep-sea fan during sapropel S1 at seasonal to millennial time-scales
Source: Copernicus journal article supplement (doi:10.5194/cp-2020-114), 2020-10-02

## Supplement of

# “Deoxygenation dynamics above the western Nile deep-sea fan during sapropel S1 at seasonal to millennial time-scales”

Cécile L. Blanchet et al.

Correspondence to: Cécile L. Blanchet (blanchet@gfz-potsdam.de)

## S1. Sedimentary patterns on the western Nile deep-sea fan

**Supplementary Figure 1.** Age models and depth-to-age transformations for cores on the western Nile deep-sea fan. Cores MD27PT and MD04-2627: sedimentation rates (step curves), dating (diamonds) and Ti/Ca profiles (continuous lines) from Ménot et al. (2020) and Revel et al. (2015). Cores P33, P73 and P99: half-core surface images (for core P99, realised after sampling with empty parts shown as crosses), section number (roman numbers), schematic lithologic log (white: bioturbated, dashed: faint laminations, hatched: laminations), linear sedimentation rates (cm/ka, step curves), tie-points and age-depth relationship as computed by the Bacon software (V2.3, Blaauw and Christen, 2011), with age uncertainty envelope as dashed lines (blue violin distribution dots: radiocarbon ages, orange violin distribution dots: tie points determined by aligning Ti/Ca ratios T1-T6), Log(Ti/Ca) ratios from XRF scanning with tie-points T1 to T6 determined on each record and used to improve the age models for cores P73 and P99. See text and table 2 for more details.

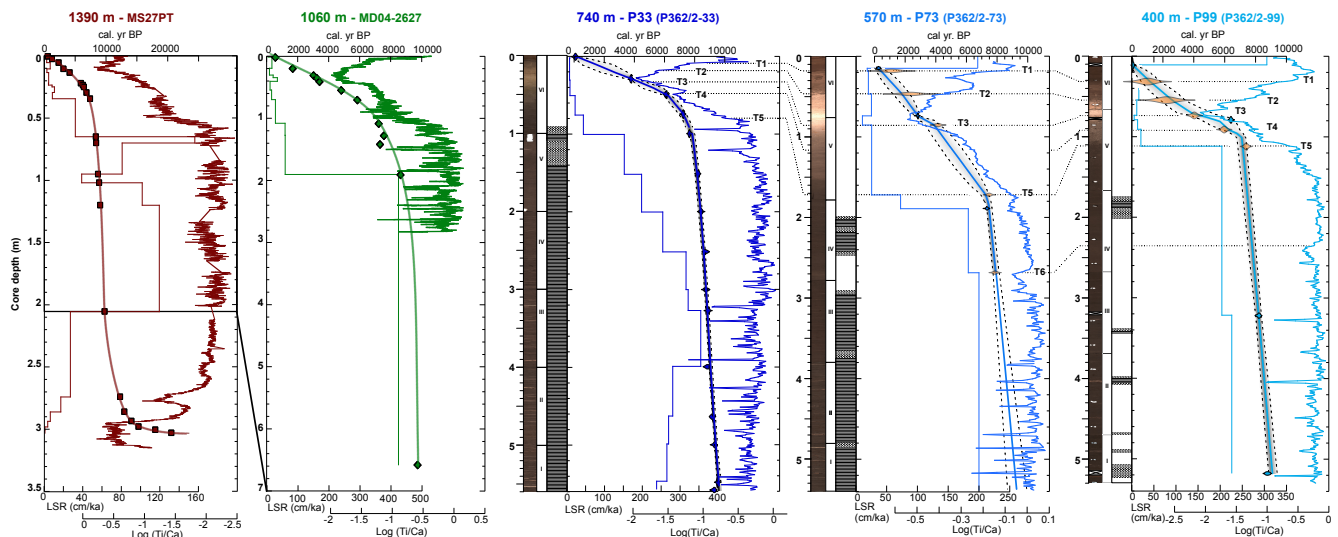

## S2. Identification of biomarkers on a gas chromatograph

**Supplementary Figure 2.** Gas chromatograms from the apolar fraction of sedimentary lipids. A: Sample collected at 484 cm in the laminated interval (sapropel S1) that shows a high concentration in long-chain odd n-alkanes (n-C<sub>25</sub>-n-C<sub>35</sub>), tracers of terrestrial organic matter. B: Close up from A that shows the presence of triterpenoids (T) and lycopane (L) (see text for details). C: Sample collected at 15 cm in non-laminated sediments, which has a lower content in n-alkanes. D: Close-up from C, which also shows lower concentrations in triterpenoids and lycopane. In A and C: the n-C<sub>22</sub> anti-iso is the internal standard used (in both cases 10 µl injected).

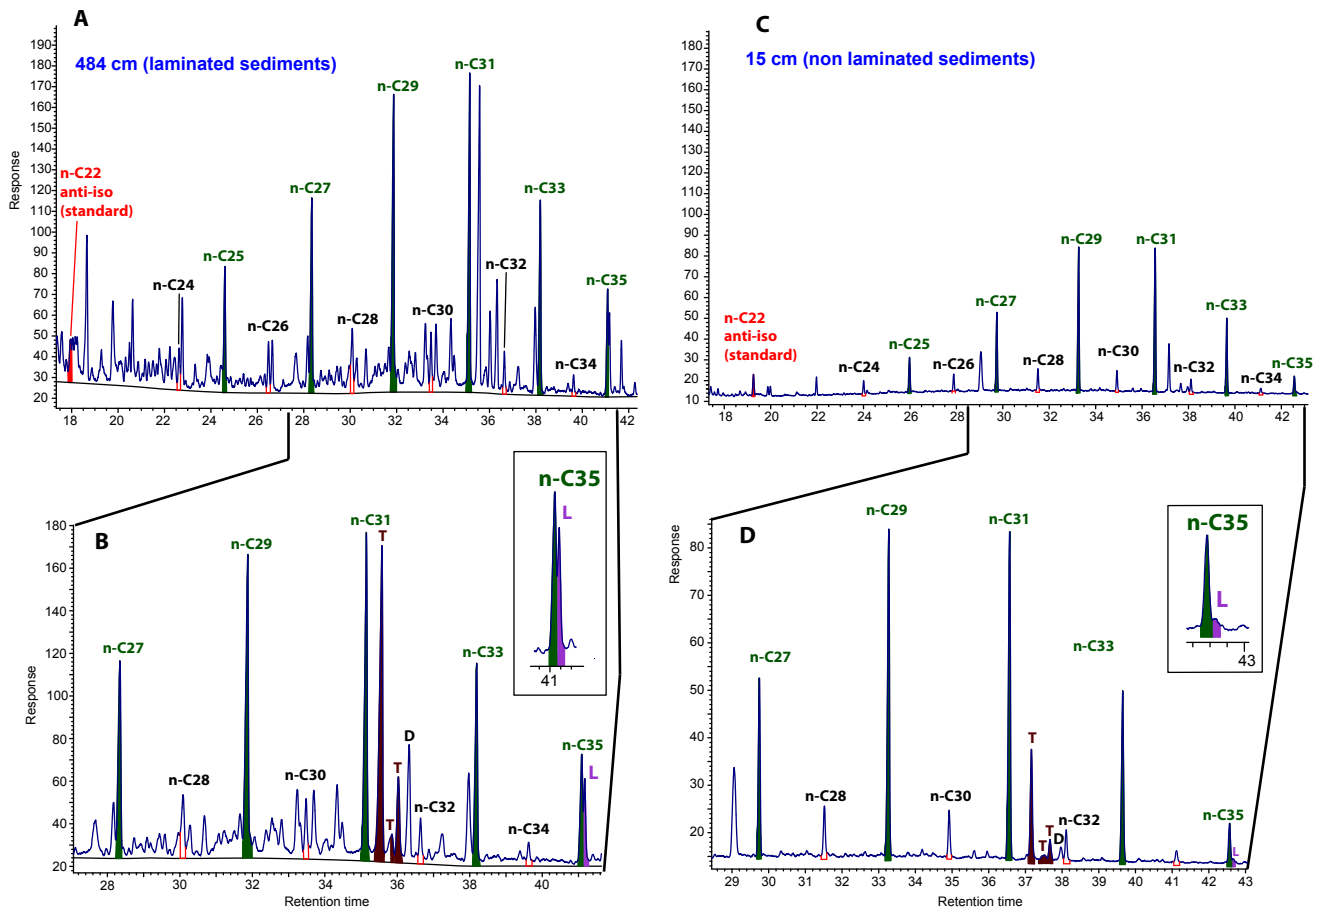

### S3. Lamination patterns in cores from the Nile DSF

**Supplementary Figure 3.** Comparison of laminations in core P33, P73 and P99 showing the presence of LL2 in all cores. From right to left for each core: Location of thin section on the lithologic logs (red box, legend similar as in Supplementary Figure 1); Core picture in natural light with sampling slab (above) and scanned 10 cm-long thin sections in cross-polarised light (below); Microfacies interpretations, with colour codes similar as in the main text: red: LL1, grey: DL1, yellow: LL2 and black: DL2. The different texture in thin sections of cores P73 and P99 is due to air bubbles, which got trapped in the resin during the process.

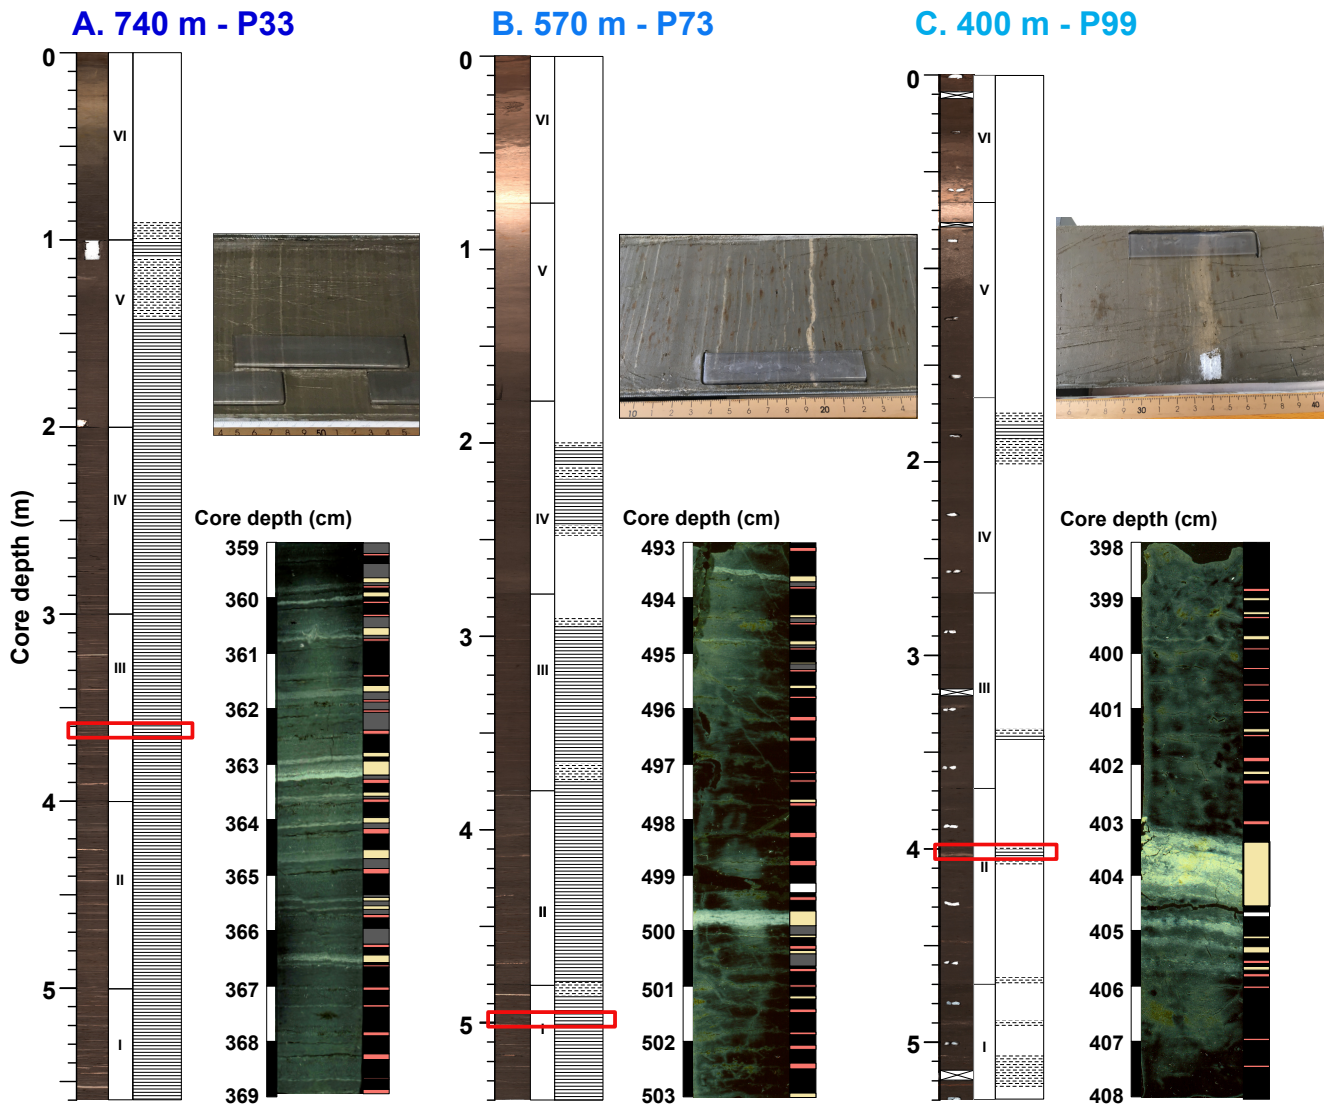

#### S4. Additional microscopic observations

**Supplementary Figure S4.** A: partly-polarised (up) and directly (down) transmitted light microscope images of a foraminifera filled with iron sulfides (deposited at the bottom of the shell). B: Backscatter SEM image of a grain of iron sulphide, probably pyrite.

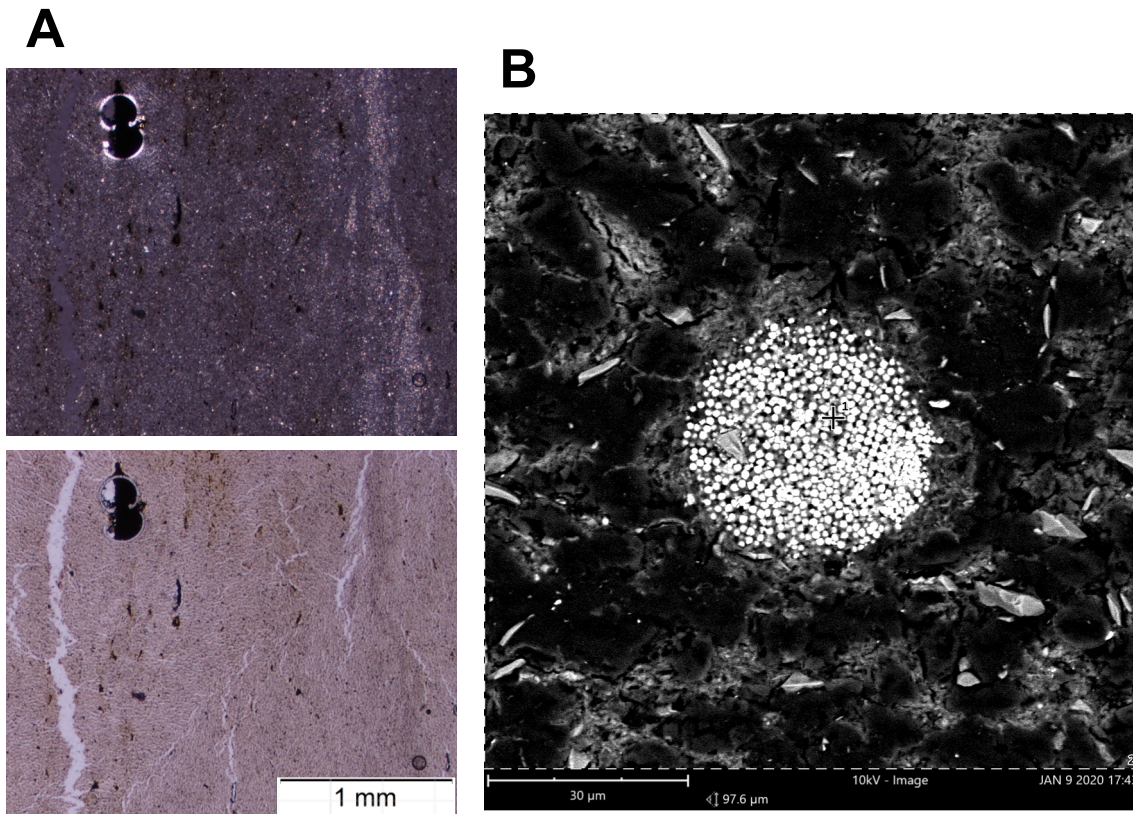

Supplement: Supplementary file 1 [file cp-2020-114-supplement.pdf]
